# Supplementary material for: A Music Recommendation System Based on User Behaviors and Genre Classification
Source: Hindawi journal article supplement (doi:10.1155/2020/5619462), 2012-01-01
Supplement: f1 [file 5619462.f1.pdf]

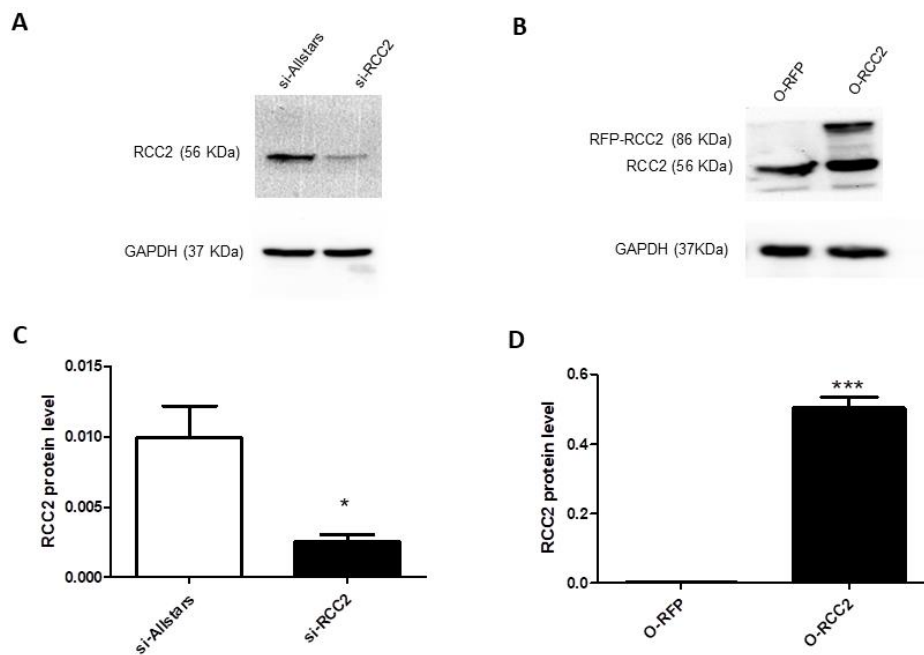

**Additional file 1.** Expression of RCC2 expression in MCF-7 cells as assessed by Western blot analysis. MCF-7 cells were cultured and transfected with (A) anti-RCC2 siRNA (si-RCC2) or (B) RCC2-expressing plasmids (O-RCC2). Allstars siRNA (si-Allstars) and RFP-expressing plasmids (O-RFP) were used as the respective controls. Following normalization by GAPDH expression, Western blot analysis detected a significant decrease (C) and increase (D) in RCC2 expression in MCF-7 cells transfected with anti-RCC2 siRNA or RCC2-expressing plasmid, respectively, compared with the corresponding controls. \* $p < 0.05$ .

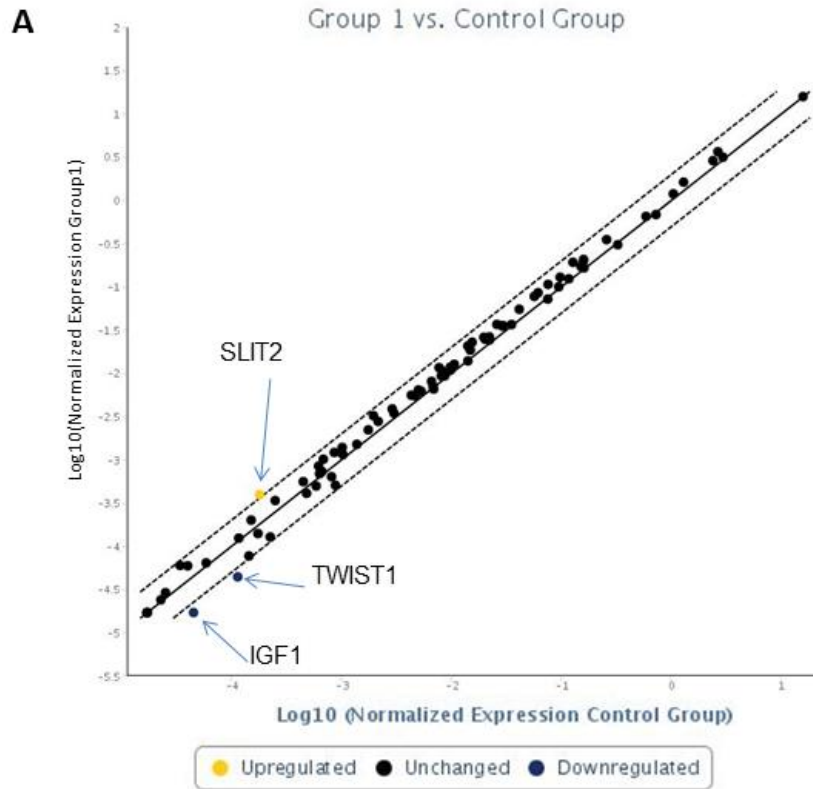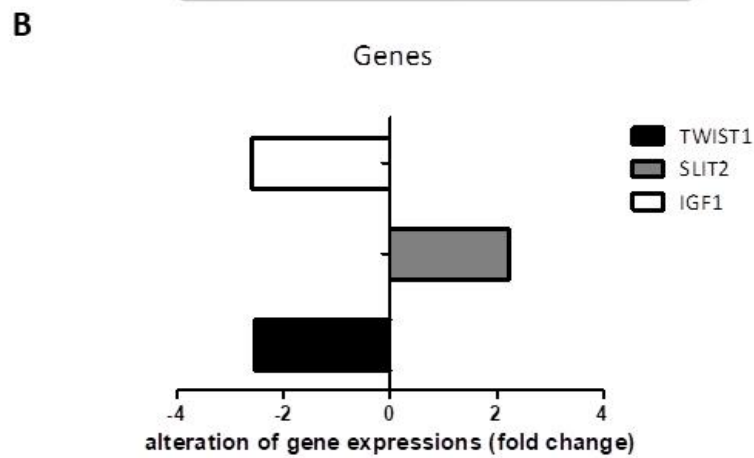

**Additional file 2.** Determination of the downstream pathway of RCC2 in MCF-7 cells by means of human breast cancer PCR arrays. (A) MCF-7 cells were transfected with anti-RCC2 siRNA, and cells transfected with Allstars siRNA were used as a negative control. Fold changes were calculated and expressed as log-normalized ratios

of the siRNA-transfected cells/controls. Genes with at least a 3-fold change in expression were considered to be biologically significant and are shown. **(B)** The result is depicted in a histogram.

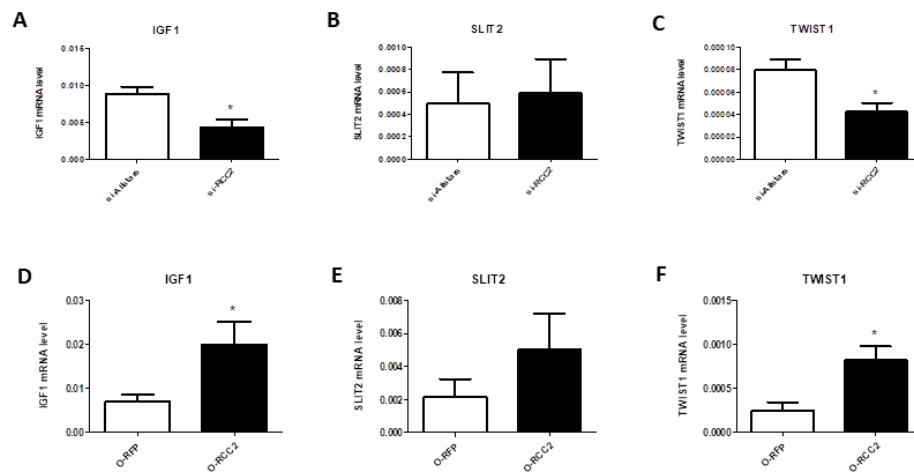

**Additional file 3.** Assessment of the transcription levels of IGF1, SLIT2 and TWIST1 in MCF-7 cells using real-time PCR. MCF-7 cells were transfected with anti-RCC2 siRNA (si-RCC2) **(A, B, C)** or RCC2-expressing plasmids (O-RCC2) **(D, E, F)**. Cells transfected with Allstars siRNA (si-Allstars) and RFP-expressing plasmids (O-RFP) were used as the corresponding negative controls. \* $p < 0.05$ , \*\* $p < 0.01$  and \*\*\* $p < 0.001$ .

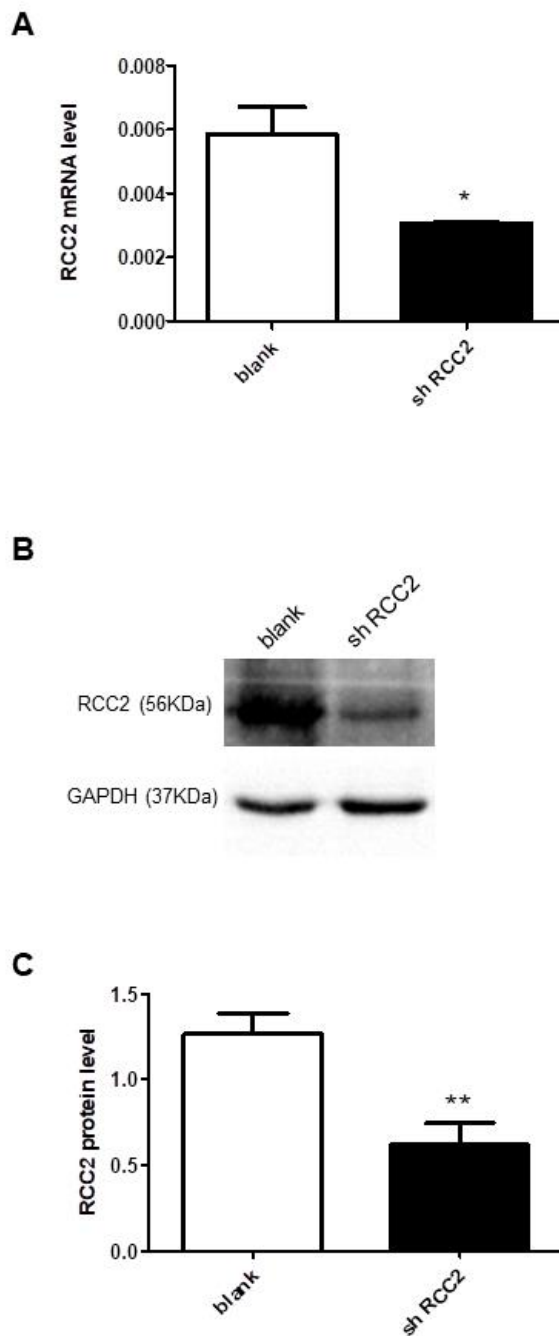

**Additional file 4.** RCC2 mRNA and protein levels in MCF-7 cells as assessed by real-time PCR and Western blot analysis. MCF-7 cells were infected with anti-RCC2 shRNA lentiviral vector (shRCC2) or empty lentiviral vector (blank).

\* $p < 0.05$ , and \*\* $p < 0.01$ .

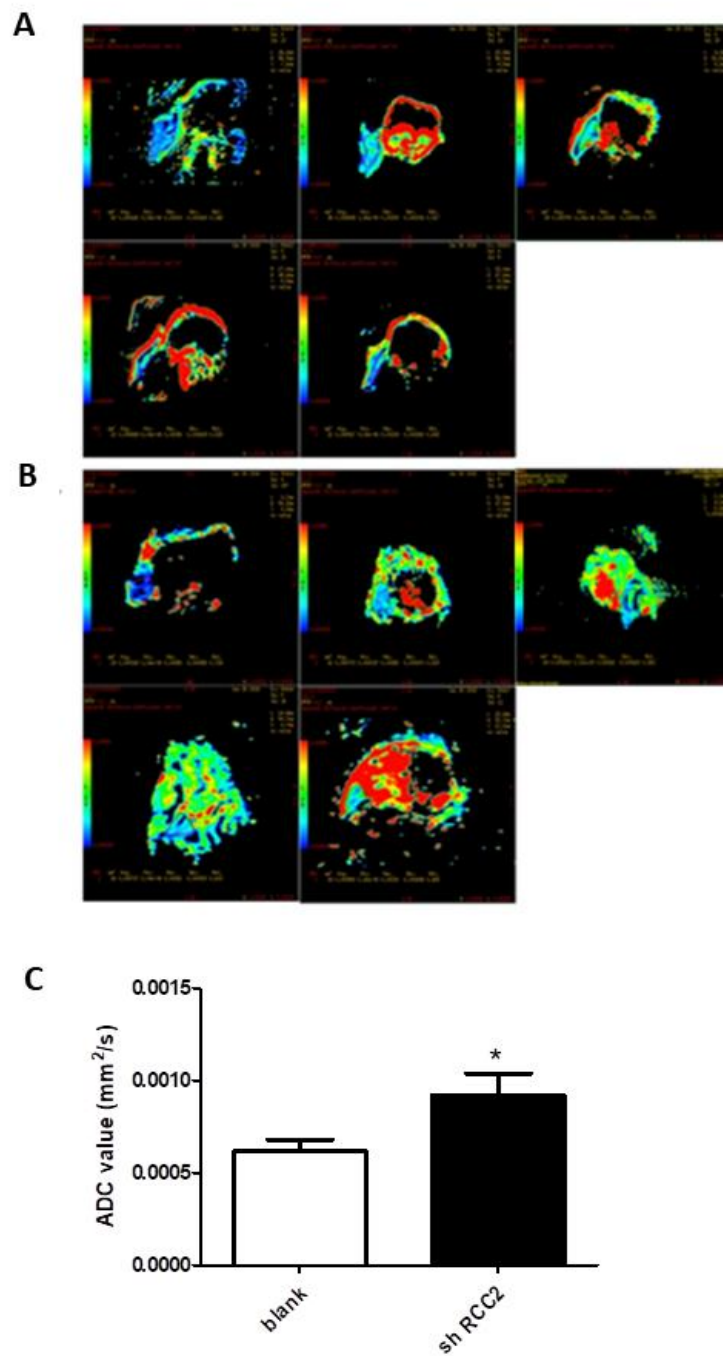

**Additional file 5.** Effect of RCC2 expression on tumor growth in tumor-bearing mice as assessed by MRI. (A) Mice injected with empty vector-infected MCF-7 cells were used as controls (blank). (B) MCF-7 cells infected with anti-RCC2 shRNA were injected into nude mice to generate tumor-bearing mice (shRCC2). Sagittal

T2-weighted MRI (T2WI) analysis of the tumors was conducted on the 28<sup>th</sup> day after injection. (C) The analytical result is presented in a bar graph. \*p<0.05.

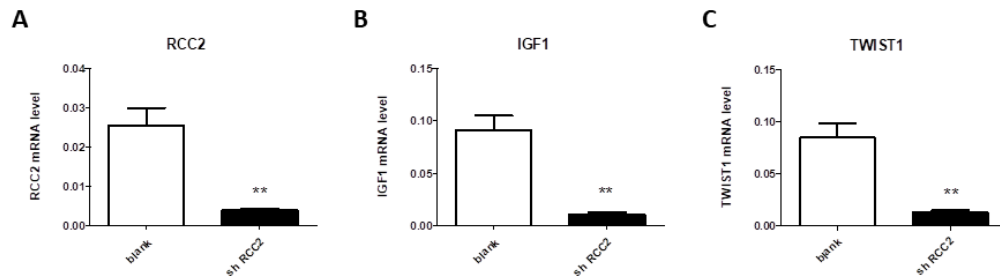

**Additional file 6.** Expression levels of IGF1, RCC2 and TWIST1 in tumors from xenograft mouse models as assessed by real-time PCR. The mice were injected with MCF-7 cells **infected** with lentivirus containing anti-RCC2 shRNA (shRCC2) or empty vectors (blank). \*p<0.05.

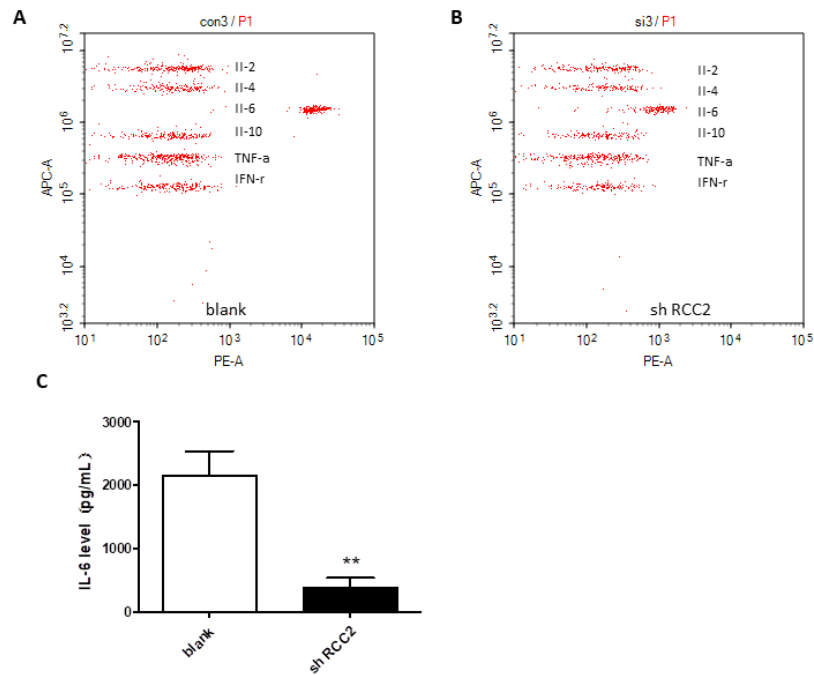

**Additional file 7.** Measurement of cytokine production in sera from tumor-bearing mice. Flow cytometric analysis was used to measure the IL-2, IL-4, IL-6, IL-10, TNF- $\alpha$  and IFN- $\gamma$  levels in the serum. Serum was obtained from mice bearing tumors originating from MCF-7 cells **infected** with lentivirus containing anti-RCC2 shRNA (shRCC2) (**A**) or empty vectors (blank) (**B**). (**C**) ELISA was used to measure the IL-6 levels in the serum. \*\* $p < 0.01$ .

**A**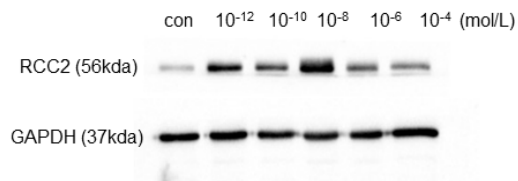**B**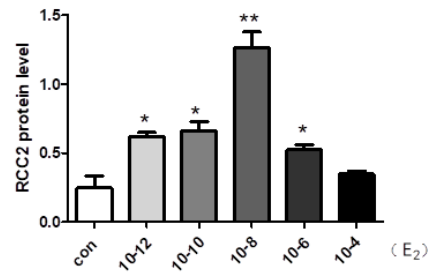

**Additional file 8.** Effect of estrogen on RCC2 expression. MCF-7 cells were incubated with estradiol-17β (E<sub>2</sub>) at concentrations from 10<sup>-4</sup> to 10<sup>-12</sup> mol/L. RCC2 expression was detected using Western blotting (A), and the expression was normalized to GAPDH expression (B).
